# Supplementary material for: External Validation of a Breath-Based Prediction Model for Malignant Pleural Mesothelioma
Source: MDPI journal article supplement (doi:10.3390/cancers14133182), 2022-06-29
Supplement: s1 [file s1]

# External Validation of a Breath-Based Prediction Model for Malignant Pleural Mesothelioma

Eline Janssens, Eline Schillebeeckx, Kathleen Zwijsen, Jo Raskin, Joris Van Cleemput, Veerle F Surmont, Kristiaan Nackaerts, Elly Marcq, Jan P. van Meerbeeck and Kevin Lamote

**Table S1.** Model specifications of the original and updated prediction models.

|                  | Original model | Updated model |
|------------------|----------------|---------------|
| <b>Intercept</b> | 0.2863634      | -0.01539101   |
| <b>P1</b>        | -9.3875710     | .             |
| <b>P7</b>        | -3.9149386     | .             |
| <b>P9</b>        | 30.9184867     | -20.26094596  |
| <b>P15</b>       | -14.4468673    | .             |
| <b>P21</b>       | -10.1389553    | .             |
| <b>P26</b>       | -30.1241610    | .             |
| <b>P84</b>       | 91.8151273     | .             |
| <b>P88</b>       | -19.0494276    | 34.43419887   |
| <b>P101</b>      | 47.9473706     | 99.13002708   |
| <b>P122</b>      | 8.2431091      | 33.61673132   |
| <b>P236</b>      | 0.8623499      | .             |

Model intercept and regression coefficients of the selected features are displayed.

**Table S2.** Kendall's  $\tau$  rank correlation between the age of the pleural mesothelioma patients and the volatile organic compounds (VOCs) of the original model.

| VOCs        | Age              |         |
|-------------|------------------|---------|
|             | Kendall's $\tau$ | p-value |
| <b>P1</b>   | 0.053            | 0.435   |
| <b>P7</b>   | - 0.045          | 0.506   |
| <b>P9</b>   | - 0.051          | 0.453   |
| <b>P15</b>  | 0.172            | 0.012*  |
| <b>P21</b>  | 0.112            | 0.102   |
| <b>P26</b>  | 0.040            | 0.560   |
| <b>P84</b>  | - 0.060          | 0.385   |
| <b>P88</b>  | 0                | 1       |
| <b>P101</b> | 0.049            | 0.479   |
| <b>P122</b> | - 0.026          | 0.710   |
| <b>P236</b> | - 0.094          | 0.168   |

\*p < 0.05.

**Table S3.** Comparison of the peak intensities of the analysed volatile organic compounds between breath samples taken with ( $n = 3$ ) and without ( $n = 3$ ) additional viral filter (paired Wilcoxon signed rank test).

| Peak      | Peak intensity         |                        | p-value |
|-----------|------------------------|------------------------|---------|
|           | With viral filter      | Without viral filter   |         |
| <b>P1</b> | 0.0483 (0.0476-0.0500) | 0.0543 (0.0513-0.0563) | 0.438   |
| <b>P7</b> | 0.0250 (0.0249-0.0250) | 0.0219 (0.0195-0.0235) | 0.400   |
| <b>P9</b> | 0.0095 (0.0088-0.0103) | 0.0107 (0.0104-0.0109) | 0.438   |

---

|             |                        |                        |       |
|-------------|------------------------|------------------------|-------|
| <b>P15</b>  | 0.0125 (0.0122-0.0127) | 0.0142 (0.0127-0.0144) | 0.438 |
| <b>P21</b>  | 0.0047 (0.0045-0.0051) | 0.0054 (0.0052-0.0060) | 0.438 |
| <b>P26</b>  | 0.2085 (0.1940-0.2250) | 0.1363 (0.1160-0.2010) | 0.438 |
| <b>P84</b>  | 0.0004 (0.0002-0.0005) | 0.0000 (0.0000-0.0003) | 0.201 |
| <b>P88</b>  | 0.0092 (0.0092-0.0097) | 0.0096 (0.0090-0.0100) | 0.400 |
| <b>P101</b> | 0.0020 (0.0019-0.0021) | 0.0011 (0.0010-0.0012) | 0.438 |
| <b>P122</b> | 0.0131 (0.0119-0.0135) | 0.0135 (0.0116-0.0138) | 0.438 |
| <b>P236</b> | 0.0264 (0.0246-0.0300) | 0.0180 (0.0174-0.0254) | 0.438 |

---

Values presented as median (Q1-Q3).
